# Supplementary material for: Interdecadal cycles in Australian annual rainfall
Source: Copernicus journal article supplement (doi:10.5194/hess-29-2167-2025), 2025-05-08
Supplement: Supplementary file 2 [file hess-29-2167-2025-supplement.zip]

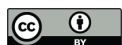

## *Supplement of*

# **Interdecadal cycles in Australian annual rainfall**

**Tobias F. Selkirk et al.**

*Correspondence to:* Tobias F. Selkirk ([selkirkt@unimelb.edu.au](mailto:selkirkt@unimelb.edu.au))

- [hess-29-2167-2025-supplement-title-page.pdf](#)
- [S1.gif](#)
- [Selkirk\\_HESS\\_Supplimentary\\_PRINT.pdf](#)

The copyright of individual parts of the supplement might differ from the article licence.
